# Supplementary material for: MATCH-SALSA – Multi-scale Atmospheric Transport and CHemistry model coupled to the SALSA aerosol microphysics model – Part 1: Model description and evaluation
Source: Copernicus journal article supplement (doi:10.5194/gmd-8-171-2015), 2015-02-06
Supplement: Supplementary file 1 [file gmd-8-171-2015-supplement.zip]

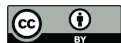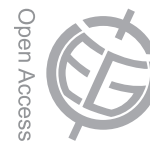

## *Supplement of*

# **MATCH-SALSA – Multi-scale Atmospheric Transport and CHemistry model coupled to the SALSA aerosol microphysics model – Part 1: Model description and evaluation**

**C. Andersson et al.**

*Correspondence to:* C. Andersson (camilla.andersson@smhi.se)

- [gmd-8-171-2015-supplement-cover-letter.pdf](#)
- [Supplement A - RMK 115.pdf](#)
- [Supplement B - chemistry final.pdf](#)
- [Supplement C - organic cond and nucl.pdf](#)
