# Supplementary material for: MATCH-SALSA – Multi-scale Atmospheric Transport and CHemistry model coupled to the SALSA aerosol microphysics model – Part 1: Model description and evaluation
Source: Copernicus journal article supplement (doi:10.5194/gmd-8-171-2015), 2015-02-06
Supplement: Supplementary file 2 [file gmd-8-171-2015-supplement.zip]

Archive with 4 entries (4 files):
- Supplement A - RMK 115.pdf
- gmd-8-171-2015-supplement-cover-letter.pdf
- Supplement C - organic cond and nucl.pdf
- Supplement B - chemistry final.pdf
