# Supplementary material for: MATCH-SALSA – Multi-scale Atmospheric Transport and CHemistry model coupled to the SALSA aerosol microphysics model – Part 1: Model description and evaluation
Source: Copernicus journal article supplement (doi:10.5194/gmd-8-171-2015), 2015-02-06
Supplement: Supplementary file 2 [file gmd-8-171-2015-supplement.zip › Supplement B - chemistry final.pdf]

## Supplement B – Chemistry

### Isoprene chemistry and emissions

The isoprene chemistry scheme used in the MATCH-model is somewhat more condensed, i.e., uses fewer model species and reactions (7 species, 26 reactions) than the EMEP MSC-W scheme (currently, EmChem09: 19 species, 32 reactions; Simpson et al., 2012). Both are, however, very small compared to more explicit chemical mechanisms, such as, e.g., the MCM scheme (<http://mcm.leeds.ac.uk/>) with hundreds of species and reactions for the isoprene chemistry.

The EMEP MSC-W isoprene scheme is based on the isoprene chemistry scheme by Paulson and Seinfeld (1992) (with a few reactions omitted, as described by Simpson et al., 1993); the scheme has been updated with new reaction rate constants and some other changes of the chemical mechanism during 2008-2009 (Simpson et al., 2012).

The MATCH model isoprene scheme was constructed in 1998 (Langner et al., 1998) and is based on the Carter 1-product scheme (Carter, 1996). The MATCH isoprene scheme was updated simultaneously as the EMEP scheme (EmChem09) taking into account the same new reaction rate data.

Both the MATCH and EMEP MSC-W model isoprene schemes were chosen to be computationally efficient and still model ozone formation well (compared to larger chemical mechanisms). The compact MATCH isoprene scheme has been shown to yield comparable ozone concentrations as the somewhat larger EMEP MSC-W scheme (Langner et al., 1998) and has been successfully used in many studies focused on ozone (e.g., van Loon et al., 2007).

The isoprene *emission* scheme in the MATCH-SALSA model is different from the completely revised biogenic emission module in the EMEP MSC-W model (Simpson et al., 2012). The emissions of isoprene in the MATCH and EMEP MSC-W models are compared in Langner et al. (2012); the total European isoprene emissions are about twice as large in the EMEP MSC-W model as in the MATCH model.

The MATCH SOA chemistry is presently under development. The latest version of MATCH includes a new biogenic emission model, including isoprene and terpene emissions. In the current MATCH-SALSA version, SOA formation from terpene emissions ( $\alpha$ -pinene) is taken into account. In future versions of MATCH-SALSA, SOA formation from isoprene will be included as well.

### MATCH-SALSA chemical mechanism

The chemical reactions and rates used in the MATCH-SALSA model are found in Table 1 (except for particulate ammonium species). The following particulate nitrogen-species are included in MATCH-SALSA: ammonium sulfate  $[(\text{NH}_4)_2\text{SO}_4]$ , ammonium nitrate  $[\text{NH}_4\text{NO}_3]$  and coarse mode nitrate.

These species are all treated outside the SALSA-module and the ammonium chemistry scheme and gas-particle partitioning are very simplified:

$\text{NH}_3(\text{g})$  reacts instantaneously (and irreversibly) with available sulfate and form ammonium sulfate  $(\text{NH}_4)_2\text{SO}_4$ , which is distributed over different particle sizes according to the sulfate distribution in MATCH-SALSA.

If there is excess  $\text{NH}_3(\text{g})$  available, ammonium nitrate can be formed via the reaction:

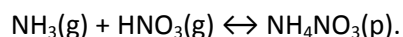

The ammonium nitrate is assumed to be in equilibrium and the dissociation constant of  $\text{NH}_4\text{NO}_3$  is dependent on relative humidity and temperature, using the equations and parameters from Mozurkewich (1993). Ammonium nitrate is distributed over different particle sizes according to the available aerosol surface area.

Table 1. Gas phase chemical reactions and heterogeneous reactions in the MATCH model and the corresponding reaction rates. The KPP, kinetic pre-processor (Damian et al., 2002), is used to produce the Fortran code for the chemical solver. Text within {}-brackets are comments or compounds in the reactions which are not explicitly included in the chemical mechanism.

| Chemical reaction                                                                             | Rate                                    |
|-----------------------------------------------------------------------------------------------|-----------------------------------------|
| <b>{Inorganic chemistry}</b>                                                                  |                                         |
| { 1.} O {+ O <sub>2</sub> + M} = O <sub>3</sub>                                               | KOO <sub>2</sub> ;                      |
| { 7.} O <sub>1</sub> D {+ M} = O                                                              | KO <sub>1</sub> DtoO;                   |
| { 8.} O <sub>1</sub> D + H <sub>2</sub> O = 2 OH                                              | 2.2e-10;                                |
| { 11.} O <sub>3</sub> + NO = NO <sub>2</sub> {+O <sub>2</sub> }                               | ARR(1.4E-12, -1310.);                   |
| { 12.} O <sub>3</sub> + NO <sub>2</sub> = NO <sub>3</sub> {+O <sub>2</sub> }                  | ARR(1.4E-13, -2470.);                   |
| { 13.} O <sub>3</sub> + OH = HO <sub>2</sub> {+O <sub>2</sub> }                               | ARR(1.7E-12, -940.);                    |
| { 14.} O <sub>3</sub> + HO <sub>2</sub> = OH {+2O <sub>2</sub> }                              | KO <sub>3</sub> HO <sub>2</sub> ;       |
| { 15.} NO + NO <sub>3</sub> = 2 NO <sub>2</sub>                                               | ARR(1.8E-11, 110.);                     |
| { 17.} NO + HO <sub>2</sub> = NO <sub>2</sub> + OH                                            | ARR(3.6E-12, 270.);                     |
| { 19.} NO <sub>2</sub> + NO <sub>3</sub> = NO + NO <sub>2</sub>                               | ARR(4.5E-14, -1260.);                   |
| { 30.} OH + HO <sub>2</sub> = H <sub>2</sub> O                                                | ARR(4.8E-11, 250.);                     |
| { 31.} OH + H <sub>2</sub> O <sub>2</sub> = HO <sub>2</sub> {+H <sub>2</sub> O}               | ARR(2.9E-12, -160.);                    |
| { 33.} OH + H <sub>2</sub> = HO <sub>2</sub> {+H <sub>2</sub> O}                              | ARR(7.7E-12, -2100.);                   |
| { 35.} OH + HNO <sub>3</sub> = NO <sub>3</sub> {+H <sub>2</sub> O}                            | KMT <sub>3</sub> _OH_HNO <sub>3</sub> ; |
| { 36.} 2 HO <sub>2</sub> = H <sub>2</sub> O <sub>2</sub>                                      | FH <sub>2</sub> O*ARR(2.2E-13, 600.);   |
| { 37.} 2 HO <sub>2</sub> + M = H <sub>2</sub> O <sub>2</sub>                                  | FH <sub>2</sub> O*ARR(1.9E-33, 980.);   |
| OH + HONO = NO <sub>2</sub>                                                                   | ARR(2.5e-12, -260.0);                   |
| OH + HO <sub>2</sub> NO <sub>2</sub> = NO <sub>2</sub> {+ H <sub>2</sub> O + O <sub>2</sub> } | ARR(3.2e-13, 690.0);                    |
| <b>{Sulfur chemistry}</b>                                                                     |                                         |
| { 39.} OH + SO <sub>2</sub> = HO <sub>2</sub> + H <sub>2</sub> SO <sub>4</sub>                | KSO <sub>2</sub> OH;                    |
| <b>{Methane chemistry}</b>                                                                    |                                         |
| { 59.} OH + CH <sub>4</sub> = CH <sub>3</sub> O <sub>2</sub>                                  | KOHCH <sub>4</sub> ;                    |
| { 70.} OH + CO = HO <sub>2</sub>                                                              | KOHCO;                                  |

|                                                                                                                                                                                                     |                                                                                                                                                                            |
|-----------------------------------------------------------------------------------------------------------------------------------------------------------------------------------------------------|----------------------------------------------------------------------------------------------------------------------------------------------------------------------------|
| { 60.} $\text{CH}_3\text{O}_2 + \text{NO} = \text{HCHO} + \text{HO}_2 + \text{NO}_2$                                                                                                                | ARR(2.3e-12, 360.0);                                                                                                                                                       |
| { 61.} $2 \text{CH}_3\text{O}_2 = 2 \text{HCHO} + 2 \text{HO}_2$                                                                                                                                    | ARR(7.4E-13, -520.);                                                                                                                                                       |
| { 62.} $2 \text{CH}_3\text{O}_2 = \text{CH}_3\text{OH} + \text{HCHO}$                                                                                                                               | KCH3O2x2b ;                                                                                                                                                                |
| { 63.} $\text{OH} + \text{CH}_3\text{OH} = \text{HO}_2 + \text{HCHO} \{+\text{H}_2\text{O}\}$                                                                                                       | KOHCH3OH ;                                                                                                                                                                 |
| { 65.} $\text{HO}_2 + \text{CH}_3\text{O}_2 = 0.9 \text{CH}_3\text{O}_2\text{H} + 0.1 \text{HCHO}$                                                                                                  | ARR(3.8E-13, 780.);                                                                                                                                                        |
| {67&68} $\text{CH}_3\text{O}_2\text{H} + \text{OH} = 0.4 \text{HCHO} + 0.4 \text{OH} + 0.6 \text{CH}_3\text{O}_2 \{+0.6 \text{H}_2\text{O}\}$                                                       | ARR(5.3E-12, 190.);                                                                                                                                                        |
| { 66.} $\text{OH} + \text{HCHO} = \text{CO} + \text{HO}_2 \{+\text{H}_2\text{O}\}$                                                                                                                  | KOHHCHO;                                                                                                                                                                   |
| { 69.} $\text{NO}_3 + \text{HCHO} = \text{HNO}_3 + \text{CO} + \text{HO}_2$                                                                                                                         | ARR(2.0e-12, -2440.0);                                                                                                                                                     |
| <b>{Ethane chemistry}</b>                                                                                                                                                                           |                                                                                                                                                                            |
| { 71.} $\text{OH} + \text{C}_2\text{H}_6 = \text{C}_2\text{H}_5\text{O}_2$                                                                                                                          | ARR(6.9E-12, -1000.);                                                                                                                                                      |
| { 72.} $\text{C}_2\text{H}_5\text{O}_2 + \text{NO} = \text{HO}_2 + \text{CH}_3\text{CHO} + \text{NO}_2$                                                                                             | ARR(2.55e-12, 380.);                                                                                                                                                       |
| { 74.} $\text{C}_2\text{H}_5\text{O}_2 + \text{HO}_2 = \text{C}_2\text{H}_5\text{OOH}$                                                                                                              | ARR(3.8E-13, 900.);                                                                                                                                                        |
| {76A.} $\text{C}_2\text{H}_5\text{OOH} + \text{OH} = \text{CH}_3\text{CHO} + \text{OH}$                                                                                                             | 8.01e-12;<br>{MCM; highly uncertain rate, IUPAC gives only lower limit $k(\text{C}_2\text{H}_5\text{OOH} + \text{OH}) > 6\text{e-}12$ at 298K, but this also includes 76B} |
| {76B.} $\text{C}_2\text{H}_5\text{OOH} + \text{OH} = \text{C}_2\text{H}_5\text{O}_2$                                                                                                                | KRC92 ;                                                                                                                                                                    |
| { 75.} $\text{OH} + \text{CH}_3\text{CHO} = 0.95 \text{CH}_3\text{COO}_2 + 0.05 \text{CH}_3\text{O}_2 + 0.05 \text{CO}$                                                                             | ARR(4.4E-12, 365.);                                                                                                                                                        |
| { 79.} $\text{CH}_3\text{COO}_2 + \text{NO} = \text{NO}_2 + \text{CH}_3\text{O}_2 \{+\text{CO}_2\}$                                                                                                 | ARR(7.5e-12, 290.0);                                                                                                                                                       |
| { 80.} $\text{CH}_3\text{O}_2 + \text{CH}_3\text{COO}_2 = 0.9 \text{HO}_2 + \text{HCHO} + 0.9 \text{CH}_3\text{O}_2 + 0.1 \text{CH}_3\text{COOH}$                                                   | ARR(2.0e-12, 500.);                                                                                                                                                        |
| { 94.} $2 \text{CH}_3\text{COO}_2 = 2 \text{CH}_3\text{O}_2$                                                                                                                                        | ARR(2.9E-12, 500.);                                                                                                                                                        |
| {88&89} $\text{CH}_3\text{COO}_2 + \text{HO}_2 = 0.41 \text{CH}_3\text{COO}_2\text{H} + 0.15 \text{O}_3 + 0.44 \text{OH} + 0.44 \text{CH}_3\text{O}_2 + 0.15 \text{CH}_3\text{COOH}$                | ARR(5.2E-13, 980.);<br>{highly uncertain rate}                                                                                                                             |
| { 90.} $\text{CH}_3\text{COO}_2\text{H} + \text{OH} = \text{CH}_3\text{COO}_2$                                                                                                                      | KRC92 ;                                                                                                                                                                    |
| <b>{Ethanol chemistry}</b>                                                                                                                                                                          |                                                                                                                                                                            |
| { 64.} $\text{OH} + \text{C}_2\text{H}_5\text{OH} = \text{CH}_3\text{CHO} + \text{HO}_2$                                                                                                            | KOHC2H5OH ;                                                                                                                                                                |
| <b>{n-butane chemistry}</b>                                                                                                                                                                         |                                                                                                                                                                            |
| { 81.} $\text{OH} + \text{NC}_4\text{H}_{10} = \text{SECC}_4\text{H}_9\text{O}_2$                                                                                                                   | KOHNC4H10 ;                                                                                                                                                                |
| { 83.} $\text{NO} + \text{SECC}_4\text{H}_9\text{O}_2 = \text{NO}_2 + 0.65 \text{HO}_2 + 0.65 \text{CH}_3\text{COC}_2\text{H}_5 + 0.35 \text{CH}_3\text{CHO} + 0.35 \text{C}_2\text{H}_5\text{O}_2$ | KRO2NO;                                                                                                                                                                    |
| {108.} $\text{SECC}_4\text{H}_9\text{O}_2 + \text{HO}_2 = \text{SECC}_4\text{H}_9\text{O}_2\text{H}$                                                                                                | 0.625*KHO2RO2;                                                                                                                                                             |
| { 86.} $\text{OH} + \text{CH}_3\text{COC}_2\text{H}_5 = \text{CH}_3\text{COCHO}_2\text{CH}_3$                                                                                                       | KOHMEK;                                                                                                                                                                    |
| {105.} $\text{CH}_3\text{COCHO}_2\text{CH}_3 + \text{NO} = \text{NO}_2 + \text{CH}_3\text{COO}_2 + \text{CH}_3\text{CHO}$                                                                           | KRO2NO;                                                                                                                                                                    |
| {104.} $\text{CH}_3\text{COCHO}_2\text{CH}_3 + \text{HO}_2 = \text{CH}_3\text{COCHO}_2\text{HCH}_3$                                                                                                 | 0.625*KHO2RO2;                                                                                                                                                             |
| {107.} $\text{CH}_3\text{COCHO}_2\text{HCH}_3 + \text{OH} = \text{CH}_3\text{COCHO}_2\text{CH}_3$                                                                                                   | ARR(1.9e-12, 190.);                                                                                                                                                        |
| $\text{SECC}_4\text{H}_9\text{O}_2\text{H} + \text{OH} = \text{SECC}_4\text{H}_9\text{O}_2$                                                                                                         | KRC92;                                                                                                                                                                     |
| $\text{SECC}_4\text{H}_9\text{O}_2\text{H} + \text{OH} = \text{OH} + \text{CH}_3\text{COC}_2\text{H}_5$                                                                                             | 2.15e-11; {MCM}                                                                                                                                                            |
| <b>{Ethene chemistry}</b>                                                                                                                                                                           |                                                                                                                                                                            |
| {110.} $\text{CH}_2\text{O}_2\text{CH}_2\text{OH} + \text{NO} = \text{NO}_2 + 2 \text{HCHO} + \text{HO}_2$                                                                                          | KRO2NO;                                                                                                                                                                    |

|                                                                                                                                                                                                                                                                                       |                                                                                                                                                   |
|---------------------------------------------------------------------------------------------------------------------------------------------------------------------------------------------------------------------------------------------------------------------------------------|---------------------------------------------------------------------------------------------------------------------------------------------------|
| {113.} CH <sub>2</sub> O <sub>2</sub> CH <sub>2</sub> OH + HO <sub>2</sub> = CH <sub>2</sub> OOHCH <sub>2</sub> OH                                                                                                                                                                    | 1.2e-11 ;<br>{IUPAC – b[2005] (298K)}                                                                                                             |
| CH <sub>2</sub> OOHCH <sub>2</sub> OH + OH = CH <sub>3</sub> CHO + OH                                                                                                                                                                                                                 | 1.38e-11;<br>{MCM-rate, but product in MCM is HOCH <sub>2</sub> CHO}                                                                              |
| CH <sub>2</sub> OOHCH <sub>2</sub> OH + OH = CH <sub>2</sub> O <sub>2</sub> CH <sub>2</sub> OH                                                                                                                                                                                        | KRC92;                                                                                                                                            |
| {112.} C <sub>2</sub> H <sub>4</sub> + O <sub>3</sub> = 1.14 HCHO + 0.63 CO + 0.13 HO <sub>2</sub> + 0.13 OH + 0.14H <sub>2</sub> O <sub>2</sub> + 0.23 HCOOH                                                                                                                         | ARR(9.1E-15, -2580.);<br>{IUPAC – b rate, MCM products}                                                                                           |
| {Propene chemistry}                                                                                                                                                                                                                                                                   |                                                                                                                                                   |
| {123.} O <sub>3</sub> + C <sub>3</sub> H <sub>6</sub> = 0.545 HCHO + 0.545 CH <sub>3</sub> CHO + 0.56 CO + 0.36 OH + 0.28 HO <sub>2</sub> + 0.09 H <sub>2</sub> O <sub>2</sub> + 0.1 CH <sub>4</sub> + 0.28 CH <sub>3</sub> O <sub>2</sub> + 0.075 HCOOH + 0.075 CH <sub>3</sub> COOH | ARR(5.5E-15, -1880.);<br>{products based on MCM}                                                                                                  |
| {126.} NO + CH <sub>3</sub> CHO <sub>2</sub> CH <sub>2</sub> OH = NO <sub>2</sub> + CH <sub>3</sub> CHO + HCHO + HO <sub>2</sub>                                                                                                                                                      | KRO2NO;                                                                                                                                           |
| {122.} CH <sub>3</sub> CHO <sub>2</sub> CH <sub>2</sub> OH + HO <sub>2</sub> = CH <sub>3</sub> CHOOHCH <sub>2</sub> OH                                                                                                                                                                | 0.52*KHO <sub>2</sub> RO <sub>2</sub> ;                                                                                                           |
| CH <sub>3</sub> CHOOHCH <sub>2</sub> OH + OH = ACETOL + OH                                                                                                                                                                                                                            | 2.44e-11;                                                                                                                                         |
| ACETOL + OH =MGLYOX + HO <sub>2</sub>                                                                                                                                                                                                                                                 | ARR(1.6e-12, 305.) ; {IUPAC - b, uncertain rate}                                                                                                  |
| CH <sub>3</sub> CHOOHCH <sub>2</sub> OH + OH = CH <sub>3</sub> CHO <sub>2</sub> CH <sub>2</sub> OH                                                                                                                                                                                    | KRC92;                                                                                                                                            |
| {o-xylene chemistry}                                                                                                                                                                                                                                                                  |                                                                                                                                                   |
| {234.} OXYLENE + OH = OXYO <sub>2</sub>                                                                                                                                                                                                                                               | 1.36E-11;                                                                                                                                         |
| {235.} OXYO <sub>2</sub> H + OH = OXYO <sub>2</sub>                                                                                                                                                                                                                                   | 4.2E-11;<br>{Based on MCM 55% of OXYO <sub>2</sub> H reacts at 7.62e-11, but the other OXYO <sub>2</sub> Hs do not return to OXYO <sub>2</sub> !} |
| {219.} MAL + OH = MALO <sub>2</sub>                                                                                                                                                                                                                                                   | 5.58E-11;                                                                                                                                         |
| {220.} MALO <sub>2</sub> + NO = NO <sub>2</sub> + HO <sub>2</sub> + MGLYOX + GLYOX                                                                                                                                                                                                    | KRO2NO;                                                                                                                                           |
| { 85.} MALO <sub>2</sub> + HO <sub>2</sub> = MALO <sub>2</sub> H                                                                                                                                                                                                                      | 0.706*KHO <sub>2</sub> RO <sub>2</sub> ;                                                                                                          |
| {223.} MALO <sub>2</sub> H + OH = MALO <sub>2</sub>                                                                                                                                                                                                                                   | ARR(1.9e-12, 190.);<br>{MCM}                                                                                                                      |
| {221.} OH + GLYOX = HO <sub>2</sub> + 2 CO                                                                                                                                                                                                                                            | KOHGLYOX;                                                                                                                                         |
| {222.} OH + MGLYOX = CH <sub>3</sub> COO <sub>2</sub> + CO                                                                                                                                                                                                                            | ARR(1.9e-12, 575.);                                                                                                                               |
| {Isoprene chemistry, version recommended by IVL, Sep 1997; A few rates updated!}                                                                                                                                                                                                      |                                                                                                                                                   |
| C <sub>5</sub> H <sub>8</sub> + O <sub>3</sub> = 0.6 HCHO + 0.65 ISOPROD + 0.27 OH + 0.07 HO <sub>2</sub> + 0.07 CO + 0.2 XO <sub>2</sub> + 0.2 CH <sub>3</sub> COO <sub>2</sub> + 0.15 CH <sub>3</sub> CHO + 0.39 HCOOH                                                              | ARR(1.03E-14, -1995.)                                                                                                                             |
| C <sub>5</sub> H <sub>8</sub> + OH = ISRO <sub>2</sub> + 0.079 XO <sub>2</sub>                                                                                                                                                                                                        | ARR(2.7E-11, 390.);                                                                                                                               |
| C <sub>5</sub> H <sub>8</sub> + NO <sub>3</sub> = ISONRO <sub>2</sub>                                                                                                                                                                                                                 | ARR(3.15E-12, -450.);                                                                                                                             |
| ISRO <sub>2</sub> + NO = 0.088 ONIT + 0.912 NO <sub>2</sub> + 0.912 HO <sub>2</sub> + 0.912 ISOPROD + 0.629 HCHO                                                                                                                                                                      | ARR(4.20E-12, 180.);                                                                                                                              |
| ISRO <sub>2</sub> + HO <sub>2</sub> = C <sub>2</sub> H <sub>5</sub> OOH                                                                                                                                                                                                               | ARR(7.70E-14, 1301.);                                                                                                                             |

|                                                                                                                                                                                                                                                                                                                              |                       |
|------------------------------------------------------------------------------------------------------------------------------------------------------------------------------------------------------------------------------------------------------------------------------------------------------------------------------|-----------------------|
| $\text{ISRO}_2 + \text{CH}_3\text{COO}_2 = \text{ISOPROD} + 0.5 \text{HO}_2 + 0.5 \text{CH}_3\text{O}_2 + 0.5 \text{CH}_3\text{COOH}$                                                                                                                                                                                        | ARR(8.40E-14, 220.);  |
| $\text{ISRO}_2 + \text{CH}_3\text{O}_2 = \text{ISOPROD} + 0.5 \text{HCHO} + 0.5 \text{HO}_2$                                                                                                                                                                                                                                 | ARR(3.40E-14, 220.);  |
| $\text{C}_5\text{H}_8 + \text{O} = 0.75 \text{ISOPROD} + 0.25 \text{CH}_3\text{COO}_2 + 0.25 \text{HCHO} + 0.25 \text{CH}_3\text{O}_2$                                                                                                                                                                                       | 3.6E-11;              |
| $\text{ISONRO}_2 + \text{NO} = 1.2 \text{NO}_2 + 0.8 \text{CH}_3\text{CHO} + 0.8 \text{ONIT} + 0.8 \text{HO}_2 + 0.2 \text{ISOPROD}$                                                                                                                                                                                         | ARR(4.20E-12, 180.);  |
| $\text{ISONRO}_2 + \text{HO}_2 = \text{ONIT}$                                                                                                                                                                                                                                                                                | ARR(7.70E-14, 1301.); |
| $\text{ISONRO}_2 + \text{CH}_3\text{COO}_2 = \text{CH}_3\text{CHO} + \text{ONIT} + 0.5 \text{HO}_2 + 0.5 \text{CH}_3\text{O}_2 + 0.5 \text{CH}_3\text{COOH}$                                                                                                                                                                 | ARR(8.40E-14, 220.);  |
| $\text{ISONRO}_2 + \text{CH}_3\text{O}_2 = \text{CH}_3\text{CHO} + \text{ONIT} + 0.5 \text{HCHO} + 0.5 \text{HO}_2$                                                                                                                                                                                                          | ARR(3.40E-14, 220.);  |
| $\text{ISOPROD} + \text{OH} = 0.5 \text{CH}_3\text{COO}_2 + 0.5 \text{IPRO}_2 + 0.2 \text{XO}_2$                                                                                                                                                                                                                             | 3.36E-11;             |
| $\text{IPRO}_2 + \text{NO} = \text{NO}_2 + \text{HO}_2 + 0.59 \text{CO} + 0.55 \text{CH}_3\text{CHO} + 0.25 \text{HCHO} + 0.08 \text{GLYOX} + 0.34 \text{MGLYOX} + 0.63 \text{CH}_3\text{COC}_2\text{H}_5$                                                                                                                   | ARR(4.20E-12, 180.);  |
| $\text{IPRO}_2 + \text{HO}_2 = \text{C}_2\text{H}_5\text{OOH}$                                                                                                                                                                                                                                                               | ARR(7.70E-14, 1301.); |
| $\text{IPRO}_2 + \text{CH}_3\text{COO}_2 = 0.5 \text{HO}_2 + 0.5 \text{CH}_3\text{O}_2 + 0.5 \text{CH}_3\text{COOH} + 0.5 \text{CH}_3\text{CHO} + 0.5 \text{CH}_3\text{COC}_2\text{H}_5$                                                                                                                                     | ARR(8.40E-14, 220.);  |
| $\text{IPRO}_2 + \text{CH}_3\text{O}_2 = 0.5 \text{HCHO} + 0.5 \text{HO}_2 + 0.5 \text{CH}_3\text{CHO} + 0.5 \text{CH}_3\text{COC}_2\text{H}_5$                                                                                                                                                                              | ARR(3.40E-14, 220.);  |
| $\text{ISOPROD} + \text{O}_3 = 0.268 \text{OH} + 0.1 \text{HO}_2 + 0.114 \text{CH}_3\text{COO}_2 + 0.054 \text{CH}_3\text{O}_2 + 0.07 \text{XO}_2 + 0.155 \text{CO} + 0.146 \text{HCHO} + 0.02 \text{CH}_3\text{CHO} + 0.01 \text{GLYOX} + 0.85 \text{MGLYOX} + 0.09 \text{CH}_3\text{COC}_2\text{H}_5 + 0.462 \text{HCOOH}$ | 7.11E-18;             |
| $\text{ISOPROD} + \text{NO}_3 = 0.075 \text{CH}_3\text{COO}_2 + 0.075 \text{HNO}_3 + 0.643 \text{CO} + 0.282 \text{HCHO} + 0.925 \text{ONIT} + 0.282 \text{CH}_3\text{CHO} + 0.925 \text{HO}_2 + 0.925 \text{XO}_2$                                                                                                          | 1.0E-15;              |
| $\text{XO}_2 + \text{HO}_2 = \text{C}_2\text{H}_5\text{OOH}$                                                                                                                                                                                                                                                                 | ARR(7.7E-14, 1300.);  |
| $\text{XO}_2 + \text{CH}_3\text{O}_2 = \text{HCHO} + \text{HO}_2$                                                                                                                                                                                                                                                            | ARR(1.7E-14, 220.);   |
| $\text{XO}_2 + \text{CH}_3\text{COO}_2 = \text{CH}_3\text{O}_2$                                                                                                                                                                                                                                                              | ARR(4.2E-14, 220.);   |
| $\text{XO}_2 + \text{XO}_2 = \text{M}$                                                                                                                                                                                                                                                                                       | ARR(3.6E-16, 220.);   |
| $\text{XO}_2 + \text{NO} = \text{NO}_2$                                                                                                                                                                                                                                                                                      | ARR(4.2E-12, 180.);   |
| $\text{ONIT} + \text{OH} = \text{NO}_2 + 0.843 \text{SECC}_4\text{H}_9\text{O}_2$                                                                                                                                                                                                                                            | ARR(1.55E-11, -540.); |
| $\text{N}_2\text{O}_5 + \text{H}_2\text{O} = 2 \text{HNO}_3$                                                                                                                                                                                                                                                                 | KN2O5H2O;             |
| {TROE TYPE REACTIONS}                                                                                                                                                                                                                                                                                                        |                       |
| { 5.} $\text{O} + \text{NO} \{+ \text{M}\} = \text{NO}_2$                                                                                                                                                                                                                                                                    | KONO;                 |
| { 20.} $\text{NO}_2 + \text{NO}_3 = \text{N}_2\text{O}_5$                                                                                                                                                                                                                                                                    | KNO2NO3;              |
| { 29.} $\text{N}_2\text{O}_5 = \text{NO}_2 + \text{NO}_3$                                                                                                                                                                                                                                                                    | KN2O5;                |
| { 21.} $\text{NO}_2 + \text{OH} = \text{HNO}_3$                                                                                                                                                                                                                                                                              | KNO2OH;               |
| { 77.} $\text{CH}_3\text{COO}_2 + \text{NO}_2 = \text{PAN}$                                                                                                                                                                                                                                                                  | KPANFOR;              |
| { 78.} $\text{PAN} = \text{CH}_3\text{COO}_2 + \text{NO}_2$                                                                                                                                                                                                                                                                  | KPANDIS;              |
| {109.} $\text{C}_2\text{H}_4 + \text{OH} = \text{CH}_2\text{O}_2\text{CH}_2\text{OH}$                                                                                                                                                                                                                                        | KC2H4OH;              |

|                                                                                                                         |                                                                                 |
|-------------------------------------------------------------------------------------------------------------------------|---------------------------------------------------------------------------------|
| <b>{125.} OH + C3H6 = CH3CHO2CH2OH</b>                                                                                  | KOHC3H6;                                                                        |
| <b>{ 22.} NO2 + HO2 = HO2NO2</b>                                                                                        | KNO2HO2;                                                                        |
| <b>{ 23.} HO2NO2 = NO2 + HO2</b>                                                                                        | KHO2NO2DIS;                                                                     |
| <b>OH + NO = HONO</b>                                                                                                   | KOHNO;                                                                          |
| <b>{Heterogeneous reactions}</b>                                                                                        |                                                                                 |
| <b>{ 45.} HNO3 = NITRATE</b>                                                                                            | R_HNO3_to_NITRATE                                                               |
| <b>{ 43.} CH3O2H = AEROSOL</b>                                                                                          | R_CH3O2H_to_AEROSOL;                                                            |
| <b>{ 44.} N2O5 = 2 HNO3</b>                                                                                             | R_N2O5_to_HNO3; {heterogeneous reaction, immediate evaporation of HNO3 assumed} |
| <b>{SOA formation reactions, simplified version stopping after oxidation step for parameterised use in MATCH-SALSA}</b> |                                                                                 |
| <b>{Terpenes} APINENE + O3 = TERPPEROXY + O3</b>                                                                        | ARR(6.3e-16,-580.0) ;<br>{MCM, IUPAC recommendation 2007}                       |
| <b>APINENE + OH = TERPPEROXY + OH</b>                                                                                   | ARR(1.2e-11,444.0) ;                                                            |
| <b>APINENE + NO3 = TERPPEROXY + NO3</b>                                                                                 | ARR(1.2e-12,490.0) ;                                                            |

ARR(A, B) = A \* EXP(B/T) – Arrhenius type reaction rate

KO02: Rate from IUPAC - a

KO1DtoO = 1.8E-11\*[N2]\*EXP(107.0/T) + 3.2E-11\*O2\*EXP(67.0/T);

KO3HO2: Rate from IUPAC - a

KMT3\_OH\_HNO3: Rate from IUPAC ([http://iupac.pole-ether.fr/htdocs/datasheets/pdf/NOx10\\_HO\\_HONO2.pdf](http://iupac.pole-ether.fr/htdocs/datasheets/pdf/NOx10_HO_HONO2.pdf) using the Lamb et al., 1984 mechanism with the elementary rate constants from (Brown et al., 1999; NASA, 2000 – as referred to by IUPAC)

FH2O = 1.+1.4E-21\*[H2O]\*EXP(2200./T)

KSO2OH: Rate from IUPAC - a

KOHCH4 = 1.85E-20\*T<sup>2.82</sup>\*EXP(-987.0/T);

KOHCO = 1.44E-13 + [M]\*3.43E-33;

KCH3O2x2b = 1.03E-13\*EXP(365./T) - 7.4E-13\*EXP(-520./T);

KOHCH3OH = 6.38E-18\*T<sup>2</sup>\*EXP(144.0/T) ;

KOHHCHO = 1.25E-17\* T<sup>2</sup>\*EXP(615.0/T);

KRC92 = 1.9E-12\*EXP(190./T) ;

KOHC2H5OH = 6.7E-18\*T<sup>2</sup>\*EXP(511.0/T);

KRO2NO = 2.54E-12\*EXP(360.0/T);

KHO2RO2 = 2.91E-13\*EXP(1300.0/T);

KOHNC4H10 = 2.03E-17\*T<sup>2</sup>\*EXP(78.0/T);

KOHMEK = 2.53E-18\*T<sup>2</sup>\*EXP(503.0/T);

KOHGLYOX = 6.6E-18\*T<sup>2</sup>\*EXP(820.0/T);

KN2O5H2O = 2.5E-22+1.8E-39\*[H2O];

KONO: Pressure dependent rate from MCM [citing IUPAC2001] ( $k_0=1.0E-31*(T/300)^{-1.6}[M]$ ,  $k_{\infty}=3.0E-11*(T/300)^{0.3}$ ,  $F_c=0.85$ )

KNO2NO3: Pressure dependent rate from IUPAC - a

KN2O5: Pressure dependent rate from IUPAC - a

KNO2OH: Pressure dependent rate from MCM [citing IUPAC2002] ( $k_0=3.3E-30*(T/300)^{-3.0}[M]$ ,  $k_{\infty}=4.1E-11$ ,  $F_c=0.4$ )

KPANFOR: Pressure dependent rate from IUPAC - b

KPANDIS: Pressure dependent rate from IUPAC - b

KC2H4OH: Pressure dependent rate from IUPAC - b

KOHC3H6: Pressure dependent rate from IUPAC - b

KNO2HO2: Pressure dependent rate from IUPAC - a

KHO2NO2DIS: Pressure dependent rate from IUPAC - a

KOHNO: Pressure dependent rate from MCM [citing IUPAC2001] ( $k_0=7.4E-31*(T/300)^{-2.4}[M]$ ,  $k_{\infty}=3.3E-11*(T/300)^{-0.3}$ ,  $F_c=EXP(-T/1420.)$ )

R\_HNO3\_to\_NITRATE = 5.E-6\*[M]/2.55E19;

R\_CH3O2H\_to\_AEROSOL = 5.E-6\*[M]/2.55E19;

R\_N2O5\_to\_HNO3 = RH>0.9: 1.E-4\*[M]/2.55E19; RH<=0.9: 1.E-5\*[M]/2.55E19

Table 2. Photolysis reactions in the MATCH model.

| {Photolysis reactions}                                                                                                                                                                                                         | Rate                                                                                                |
|--------------------------------------------------------------------------------------------------------------------------------------------------------------------------------------------------------------------------------|-----------------------------------------------------------------------------------------------------|
| { 1.} O <sub>3</sub> + hv = O <sup>1</sup> D                                                                                                                                                                                   | JO <sub>3_1</sub> ;                                                                                 |
| { 2.} O <sub>3</sub> + hv = O                                                                                                                                                                                                  | JO <sub>3_3</sub> ;                                                                                 |
| { 3.} NO <sub>2</sub> + hv = NO + O                                                                                                                                                                                            | JNO <sub>2</sub> ;                                                                                  |
| { 4.} NO <sub>3</sub> + hv = NO <sub>2</sub> + O                                                                                                                                                                               | JNO <sub>3a</sub> ;                                                                                 |
| { 5.} NO <sub>3</sub> + hv = NO                                                                                                                                                                                                | JNO <sub>3b</sub> ;                                                                                 |
| { 6.} N <sub>2</sub> O <sub>5</sub> + hv = NO <sub>2</sub> + NO <sub>3</sub>                                                                                                                                                   | JN <sub>2</sub> O <sub>5</sub> ;                                                                    |
| { 7.} H <sub>2</sub> O <sub>2</sub> + hv = 2 OH                                                                                                                                                                                | JH <sub>2</sub> O <sub>2</sub> ;                                                                    |
| { 8.} HNO <sub>3</sub> + hv = NO <sub>2</sub> + OH                                                                                                                                                                             | JHNO <sub>3</sub> ;                                                                                 |
|                                                                                                                                                                                                                                |                                                                                                     |
| { 9.} HCHO + hv = 2 HO <sub>2</sub> + CO                                                                                                                                                                                       | JHCHO <sub>a</sub> ;                                                                                |
| {10.} HCHO + hv = H <sub>2</sub> + CO                                                                                                                                                                                          | JHCHO <sub>b</sub> ;                                                                                |
| {11.} CH <sub>3</sub> CHO + hv = CH <sub>3</sub> CO <sub>2</sub> + HO <sub>2</sub> + CO                                                                                                                                        | JCH <sub>3</sub> CHO ;                                                                              |
| {12.} CH <sub>3</sub> COC <sub>2</sub> H <sub>5</sub> + hv = CH <sub>3</sub> COO <sub>2</sub> + C <sub>2</sub> H <sub>5</sub> O <sub>2</sub>                                                                                   | JCH <sub>3</sub> COC <sub>2</sub> H <sub>5</sub> ;                                                  |
| {14.} GLYOX + hv = CO + HCHO                                                                                                                                                                                                   | JGLYOX ;                                                                                            |
| {15.} CH <sub>3</sub> O <sub>2</sub> H + hv = OH + HCHO + HO <sub>2</sub>                                                                                                                                                      | JCH <sub>3</sub> O <sub>2</sub> H;                                                                  |
| {16.} MGLYOX + hv = CO + CH <sub>3</sub> COO <sub>2</sub> + HO <sub>2</sub>                                                                                                                                                    | JMGLYOX;                                                                                            |
| {17.} C <sub>2</sub> H <sub>5</sub> OOH + hv = OH + CH <sub>3</sub> CHO + HO <sub>2</sub>                                                                                                                                      | JCH <sub>3</sub> O <sub>2</sub> H;                                                                  |
| {18.} CH <sub>3</sub> COO <sub>2</sub> H + hv = OH + CH <sub>3</sub> O <sub>2</sub>                                                                                                                                            | JCH <sub>3</sub> O <sub>2</sub> H;                                                                  |
| {20.} CH <sub>3</sub> COCHO <sub>2</sub> HCH <sub>3</sub> + hv = OH + CH <sub>3</sub> CHO + CH <sub>3</sub> COO <sub>2</sub>                                                                                                   | JCH <sub>3</sub> O <sub>2</sub> H;                                                                  |
| {21.} SECC <sub>4</sub> H <sub>9</sub> O <sub>2</sub> H + hv = OH + 0.65 HO <sub>2</sub> + 0.65 CH <sub>3</sub> COC <sub>2</sub> H <sub>5</sub> + 0.35 CH <sub>3</sub> CHO + 0.35 C <sub>2</sub> H <sub>5</sub> O <sub>2</sub> | JCH <sub>3</sub> O <sub>2</sub> H;                                                                  |
| {22.} CH <sub>2</sub> OOHCH <sub>2</sub> OH + hv = OH + HO <sub>2</sub> + 1.56 HCHO + 0.22 CH <sub>3</sub> CHO                                                                                                                 | JCH <sub>3</sub> O <sub>2</sub> H;                                                                  |
| {23.} CH <sub>3</sub> CHOOHCH <sub>2</sub> OH + hv = CH <sub>3</sub> CHO + HCHO + HO <sub>2</sub> + OH                                                                                                                         | JCH <sub>3</sub> O <sub>2</sub> H;                                                                  |
| {24.} OXYO <sub>2</sub> H + hv = OH + MGLYOX + MAL + HO <sub>2</sub>                                                                                                                                                           | JCH <sub>3</sub> O <sub>2</sub> H;                                                                  |
| {25.} MALO <sub>2</sub> H + hv = OH + MGLYOX + GLYOX + HO <sub>2</sub>                                                                                                                                                         | JCH <sub>3</sub> O <sub>2</sub> H;                                                                  |
| {ivl} ONIT + hv = HO <sub>2</sub> + NO <sub>2</sub> + 0.2 CH <sub>3</sub> CHO + 0.8 CH <sub>3</sub> COC <sub>2</sub> H <sub>5</sub>                                                                                            | JONIT ;                                                                                             |
| HO <sub>2</sub> NO <sub>2</sub> + hv = OH + NO <sub>3</sub>                                                                                                                                                                    | JHO <sub>2</sub> NO <sub>2_1</sub> ;                                                                |
| HO <sub>2</sub> NO <sub>2</sub> + hv = HO <sub>2</sub> + NO <sub>2</sub>                                                                                                                                                       | JHO <sub>2</sub> NO <sub>2_2</sub> ;                                                                |
| HONO + hv = OH + NO                                                                                                                                                                                                            | JHONO ;                                                                                             |
| ACETOL + hv = CH <sub>3</sub> COO <sub>2</sub> + HCHO + HO <sub>2</sub>                                                                                                                                                        | JCH <sub>3</sub> COC <sub>2</sub> H <sub>5</sub> ;<br>{same J-expression for MEK and ACETOL in MCM} |

The photolysis rates are pre-calculated with the Phodis model (Kylling et al., 1995), using absorption cross-sections and quantum yields according to CODATA and IUPAC evaluations (DeMore et al., 1997, Sander et al., 2000, Atkinson et al., 1997). Clear-sky photolysis rates are tabulated for model atmospheres for

different seasons at varying latitudes, surface albedos and heights above ground. Below clouds the photolysis rates are scaled by the ratio of the actual global radiation (with clouds) to the clear sky global radiation (Langner et al., 1998).

Table 3. Aqueous phase chemical reactions in the MATCH model, and the corresponding reaction rates. Text within {}-brackets are comments or compounds in the reactions which are not explicitly included in the chemical mechanism.

| Chemical reaction                                                            | Rate                                                        |
|------------------------------------------------------------------------------|-------------------------------------------------------------|
| <b>{Sulfur chemistry}</b>                                                    |                                                             |
| <b>{wet1a} SO<sub>2</sub>(aq) + O<sub>3</sub>(aq) = SULFATE</b>              | KSO2O3wet ;                                                 |
| <b>{wet1b} HSO<sub>3</sub><sup>-</sup>(aq) + O<sub>3</sub>(aq) = SULFATE</b> | KSO2O3wet ;                                                 |
| <b>{wet2} SO<sub>2</sub>(aq) + H<sub>2</sub>O<sub>2</sub>(aq) = SULFATE</b>  | KSO2H2O2wet ;                                               |
| <b>{wet3a} SO<sub>2</sub>(aq) = SULFATE</b>                                  | KSO2catalysedwet ; {catalysed oxidation by O <sub>2</sub> } |
| <b>{wet3b} HSO<sub>3</sub><sup>-</sup>(aq) = SULFATE</b>                     | KSO2catalysedwet ; {catalysed oxidation by O <sub>2</sub> } |

KSO2O3wet =  $1.81\text{E}4 \cdot [\text{H}^+]^{-0.4} \text{ mol}^{-1} \text{ l}$ ;  
 KSO2H2O2wet =  $8.31\text{E}5 \text{ mol}^{-1} \text{ l}$ ;  
 KSO2catalysedwet =  $5.6\text{e}-6 \text{ s}^{-1}$ ;

## References

- Atkinson, R., D. L. Baulch, R. A. Cox, R. F. Hampson Jr., J.A. Kerr, and J. Troe: Evaluated kinetics, photochemical and heterogeneous data for atmospheric chemistry, Supplement V, J. Phys. Chem. Ref. Data, 26, 521-1011, 1997.
- Atkinson, R, Baulch, D. L., Cox, R. A., Crowley, J. N., Hampson, R. F., Hynes, R. G., Jenkin, M. E., Rossi, M. J., and Troe, J. Evaluated kinetic and photochemical data for atmospheric chemistry: volume I - gas phase reactions of Ox, HOx, NOx, and SOx, species. Atmos. Chem. Phys., 4, 1461-1738, 2004; and <http://iupac.pole-ether.fr/>
- Atkinson, R., Baulch, D. L., Cox, R. A., Crowley, J. N., Hampson, R. F., Hynes, R. G., Jenkin, M. E., Rossi, M. J., Troe, J., and IUPAC Subcommittee: Evaluated kinetic and photochemical data for atmospheric chemistry: Volume II – gas phase reactions of organic species, Atmos. Chem. Phys., 6, 3625-4055, doi:10.5194/acp-6-3625-2006, 2006; and <http://iupac.pole-ether.fr/>
- Brown, S. S., Talukdar, R. K. and Ravishankara, A. R.: J. Phys. Chem. A 103, 3031, 1999.
- Carter, W. P. L.: Condensed atmospheric photooxidation mechanism for isoprene, Atmos. Environ. 30, 4275-4290, 1996.
- Damian, V., Sandu, A., Damian, M., Potra, F. Carmichael, G.R.: The kinetic preprocessor KPP - a software environment for solving chemical kinetics, Comput. Chem. Eng., 26, 1567-1579, 2002.
- DeMore, W. B., S. P. Sander, D. M. Golden, R. F. Hampson, M. J. Kurylo, C.J. Howard, A. R. Ravishankara, C. E. Kolb, and M. J. Molina, 1997, Chemical kinetics and photochemical data for use in stratospheric modeling, Evaluation 12, Jet Propul. Lab., Pasadena, California. JPL Publication 97-4
- IUPAC - a: Atkinson et al., 2004 (see above), rates as on [http://iupac.pole-ether.fr/htdocs/summary/vol1\\_summary.pdf](http://iupac.pole-ether.fr/htdocs/summary/vol1_summary.pdf) (accessed 2014-10-27).

IUPAC - b: Atkinson et al., 2006 (see above), rates as on [http://iupac.pole-ether.fr/htdocs/summary/vol2\\_summary.pdf](http://iupac.pole-ether.fr/htdocs/summary/vol2_summary.pdf) (accessed 2014-10-27).

Kylling, A., Bais, A. F., Blumthaler, M., Schreder, J., Zerefos, C. S., and Kosmidis, E.: Effect of aerosols on solar UV irradiances during the Photochemical Activity and Solar Radiation campaign, *J. Geophys. Res.*, 103, 26051–26060, doi:10.1029/98JD02350, 1998.

Lamb, J. J., Mozurkewich, M. and Benson, S. W.: *J. Phys. Chem.* 88, 6441, 1984.

Langner, J., Bergström, R., and Pleijel, H.: European Scale Modeling of Sulfur, Oxidised Nitrogen and Photochemical Oxidants, Model Development and Evaluation for the 1994 Growing Season, SMHI RMK 82, SMHI 60176 Norrköping, Sweden, 1998.

Langner, J., Engardt, M., Baklanov, A., Christensen, J. H., Gauss, M., Geels, C., Hedegaard, G. B., Nuterman, R., Simpson, D., Soares, J., Sofiev, M., Wind, P., and Zakey, A.: A multi-model study of impacts of climate change on surface ozone in Europe, *Atmos. Chem. Phys.*, 12, 10423-10440, doi:10.5194/acp-12-10423-2012, 2012.

MCM: The chemical mechanistic information was taken from the Master Chemical Mechanism, MCM v3.2 (Jenkin et al., *Atmos. Environ.*, 31, 81, 1997; Saunders et al., *Atmos. Chem. Phys.*, 3, 161, 2003; Jenkin et al., *Atmos. Chem. Phys.*, 3, 181, 2003; Bloss et al., *Atmos. Chem. Phys.*, 5, 641, 2005), via website: <http://mcm.leeds.ac.uk/MCM>.

Mozurkewich, M.: The dissociation constant of ammonium nitrate and its dependence on temperature, relative humidity and particle size, *Atmos. Environ.*, 27A, 261–270, 1993.

Paulson, S. E. and Seinfeld, J. H.: Development and evaluation of a photooxidation mechanism for isoprene, *J. Geophys. Res.*, 95, 1871-1881, 1992.

Sander, S. P., R. R. Friedl, W. B. DeMore, D. M. Golden, M. J. Kurylo, R. F. Hampson, R. E. Huie, G. K. Moortgat, A. R. Ravishankara, C. E. Kolb, and M. J. Molina, 2000, Chemical kinetics and photochemical data for use in stratospheric modeling, Evaluation 13, *Jet Propul. Lab.*, Pasadena, California. JPL Publication 00-3.

Simpson, D., Andersson-Sköld, Y., and Jenkin, M. E., Updating the chemical scheme for the EMEP MSC-W oxidant model: current status, EMEP MSC-W Note 2/93, 1993.

Simpson, D., Benedictow, A., Berge, H., Bergström, R., Emberson, L. D., Fagerli, H., Flechard, C. R., Hayman, G. D., Gauss, M., Jonson, J. E., Jenkin, M. E., Nyíri, A., Richter, C., Semeena, V. S., Tsyro, S., Tuovinen, J.-P., Valdebenito, A., and Wind, P.: The EMEP MSC-W chemical transport model – technical description, *Atmos. Chem. Phys.*, 12, 7825–7865, doi:10.5194/acp-12-7825-2012, 2012.

van Loon, M., Vautard, R., Schaap, M., Bergström, R., Bessagnet, B., Brandt, J., Builtjes, P.J.H., Christensen, J. H., Cuvelier, K., Graf, A., Jonson, J.E., Krol, M., Langner, J., Roberts, P., Rouil, L., Stern, R., Tarrasón, L., Thunis, P., Vignati, E., White, L., Wind, P.: Evaluation of long-term ozone simulations from seven regional air quality models and their ensemble average, *Atmos. Environ.* 41, 2083-2097, 2007. Korhola et al., *Geosci. Model Dev.*, 7, 161-174, doi:10.5194/gmd-7-161-2014, 2014.
